# Supplementary material for: Design and Characterization of pMyc/pMax Peptide-Coupled Gold Nanosystems for Targeting Myc in Prostate Cancer Cell Lines
Source: MDPI journal article supplement (doi:10.3390/nano13202802), 2023-10-21
Supplement: s1 [file s1]

Table S1. Raw data from ImageJ analysis of Figure S3 of TEM image of pMyc:AuNPs.

|                     | Area     | Mean    | Min    | Max     | Angle   | Length (nm) |
|---------------------|----------|---------|--------|---------|---------|-------------|
| 1                   | 1943.735 | 68.621  | 51.239 | 95.440  | 0       | 292.605     |
| 2                   | 2109.159 | 62.647  | 29.000 | 103.500 | 0       | 321.543     |
| 3                   | 1985.091 | 70.849  | 50.298 | 111.918 | -7.958  | 301.943     |
| 4                   | 2315.940 | 120.010 | 93.754 | 147.750 | -0.526  | 350.497     |
| 5                   | 1819.667 | 116.475 | 86.740 | 196.000 | -1.348  | 273.388     |
| 6                   | 2481.364 | 76.629  | 46.291 | 121.225 | 39.867  | 381.229     |
| 7                   | 1447.462 | 97.139  | 74.913 | 129.000 | 65.695  | 218.744     |
| 8                   | 2481.364 | 57.735  | 30.552 | 116.000 | -62.354 | 381.134     |
| 9                   | 1488.818 | 102.137 | 83.409 | 118.500 | -65.283 | 223.004     |
| 10                  | 1612.887 | 115.093 | 87.500 | 162.000 | -64.440 | 245.933     |
| 11                  | 1943.735 | 81.759  | 46.565 | 131.000 | 7.431   | 298.326     |
| 12                  | 1530.174 | 123.259 | 95.250 | 156.500 | -4.764  | 232.314     |
| 13                  | 1654.243 | 119.655 | 93.657 | 157.169 | 11.889  | 249.730     |
| 14                  | 1902.379 | 128.592 | 97.462 | 162.234 | 16.821  | 288.888     |
| 15                  | 1282.038 | 91.581  | 44.000 | 130.000 | 0.000   | 192.926     |
| Average length (nm) |          |         |        |         |         | 283.480     |
| SD                  |          |         |        |         |         | ± 57.95     |

Table S2. Raw data from ImageJ analysis of Figure S3 of TEM image of pMyc:pMax:AuNPs.

|                     | Area     | Mean    | Min     | Max     | Angle   | Length (nm) |
|---------------------|----------|---------|---------|---------|---------|-------------|
| 1                   | 2274.584 | 200.638 | 145.198 | 254.160 | 45      | 350.143     |
| 2                   | 1488.818 | 124.461 | 82.250  | 157.700 | 14.036  | 225.379     |
| 3                   | 1861.023 | 164.984 | 83.000  | 210.364 | -5.839  | 284.434     |
| 4                   | 1530.174 | 148.989 | 87.000  | 201.701 | -85.972 | 228.861     |
| 5                   | 1488.818 | 119.054 | 37.575  | 174.981 | 15.038  | 223.073     |
| 6                   | 1902.379 | 159.780 | 89.500  | 191.000 | 13.570  | 287.777     |
| 7                   | 2150.515 | 203.300 | 160.118 | 230.810 | 41.820  | 327.911     |
| 8                   | 1654.243 | 175.725 | 5.000   | 247.154 | -81.254 | 253.755     |
| 9                   | 2274.584 | 192.867 | 126.407 | 250.556 | -87.879 | 347.505     |
| 10                  | 2067.803 | 130.117 | 65.000  | 228.843 | 8.297   | 311.947     |
| 11                  | 1695.599 | 130.772 | 5.925   | 249.200 | 4.289   | 257.957     |
| 12                  | 2688.144 | 219.341 | 112.000 | 255.000 | 12.724  | 408.752     |
| 13                  | 1447.462 | 135.923 | 88.000  | 154.685 | -45.000 | 218.271     |
| 14                  | 2150.515 | 166.160 | 110.997 | 235.318 | 40.236  | 328.541     |
| 15                  | 1364.750 | 151.186 | 98.000  | 172.750 | 3.576   | 206.189     |
| 16                  | 1985.091 | 220.556 | 148.838 | 255.000 | -32.005 | 303.343     |
| 17                  | 1199.326 | 229.863 | 112.000 | 255.000 | -49.399 | 177.869     |
| Average length (nm) |          |         |         |         |         | 278.924     |
| SD                  |          |         |         |         |         | ± 63.267    |

Table S3 Comparative table of NS physical characteristics, peptide concentration, and cytotoxicity in the different cell types.

|                        | Diameter<br>(nm) | Hydrodynamic<br>diameter (nm) | Zeta<br>potential | Peptide<br>concentration<br>(nM) | Highest<br>Cytotoxicity<br>Vero CCL81 (%) | Highest<br>Cytotoxicity<br>LNCAP (%) | Highest<br>Cytotoxicity<br>PC-3 (%) | Highest<br>Cytotoxicity<br>DU145 (%) |
|------------------------|------------------|-------------------------------|-------------------|----------------------------------|-------------------------------------------|--------------------------------------|-------------------------------------|--------------------------------------|
| <b>AuNPs</b>           | 5.68 ± 0.84      | 243.03 ± 12.83                | -9.05 ± 6.09      | 0.00                             | 36.32                                     | 2.18                                 | 0                                   | 20.43                                |
| <b>pMyc:AuNPs</b>      | 3.28 ± 1.16      | 264.97 ± 4.39                 | -5.05 ± 3.42      | 163.60                           | 36.94                                     | 13.27                                | 0                                   | 16.4                                 |
| <b>pMax:AuNPs</b>      | 5.60 ± 1.19      | 262.57 ± 23.40                | -7.67 ± 5.71      | 200.86                           | 25.43                                     | 0                                    | 0                                   | 43.01                                |
| <b>pMyc:pMax:AuNPs</b> | 5.78 ± 1.41      | 225.03 ± 17.65                | -10.09 ± 4.04     | 223.93                           | 4.11                                      | 17.75                                | 7.1                                 | 0                                    |
